# Supplementary material
Source: HighWire-hosted journal article supplement (https://jnm.snmjournals.org/highwire/filestream/103481/field_highwire_adjunct_files/0/260521_Supplemental_Data.pdf)
Supplement: 260521_Supplemental_Data.pdf [file 260521_Supplemental_Data.pdf]

## SUPPLEMENTAL DATA

### MR Sequences Acquisition and Analysis Scheme

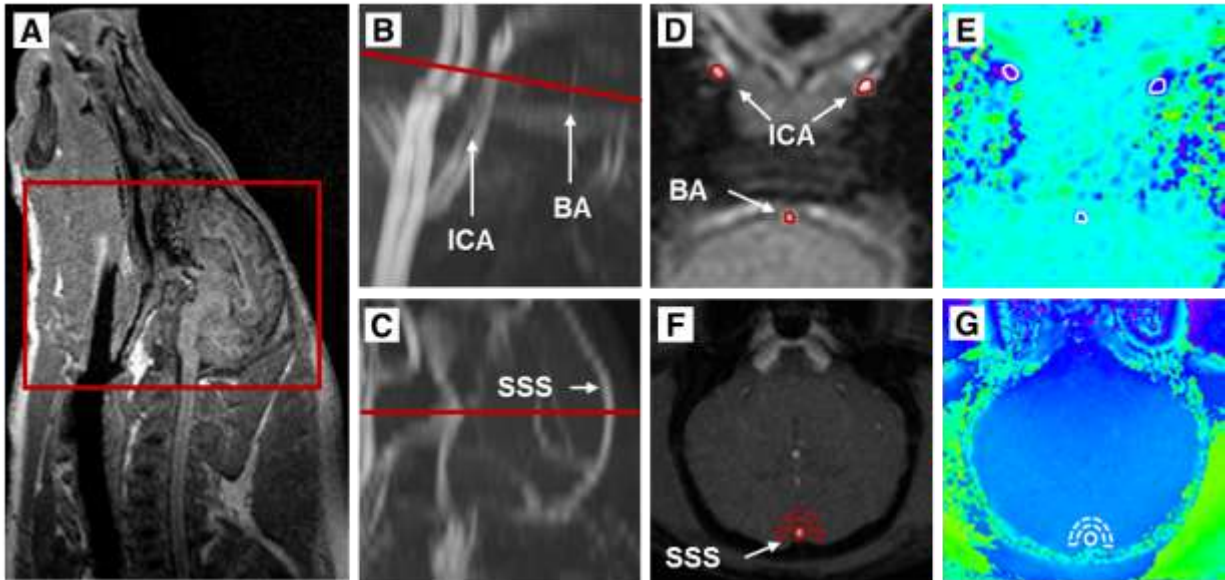

SUPPLEMENTAL FIGURE 1. (A) Sagittal MPRAGE image showing imaging region. MR angiography showing (B) the internal carotid arteries (ICA) and basilar artery (BA), and (C) the superior sagittal sinus (SSS). The red lines represent the slices used to measure WB CBF and  $S_vO_2$ . Magnitude and phase images from the slices used to estimate (D)-(E) WB CBF and (F)-(G)  $S_vO_2$ . The red regions-of-interest were transferred from the magnitude to the phase image (in white). All images are from one representative animal.

### Population-based AIFs

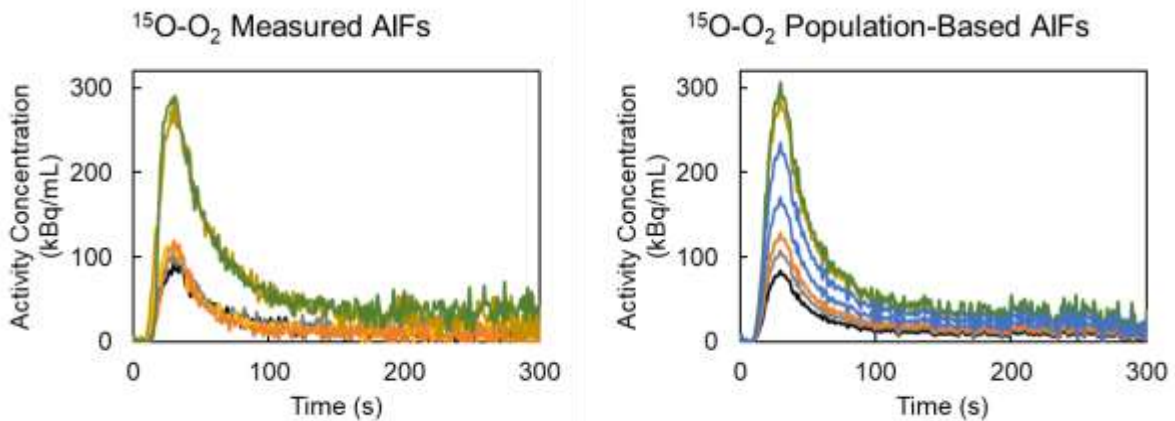

SUPPLEMENTAL FIGURE 2. Measured  $^{15}O-O_2$  AIFs (left) and their respective scaled population-based curves (right). The blue curves represent the population-based AIFs used for the two animals that arterial sampling failed.

## Arterial Blood Measurements

SUPPLEMENTAL TABLE 1. Summary of arterial blood measurements. No statistical differences were identified in any of the parameters across the acquisitions.

|                                           | Baseline   | LMC        |
|-------------------------------------------|------------|------------|
| Hematocrit (%)                            | 25.9 ± 3.4 | 25.7 ± 2.1 |
| Hemoglobin (g/dL)                         | 8.3 ± 1.1  | 8.3 ± 0.7  |
| Partial pressure of oxygen (mmHg)         | 230 ± 100  | 239 ± 102  |
| Partial pressure of carbon dioxide (mmHg) | 40.3 ± 4.3 | 41.0 ± 3.4 |
| S <sub>a</sub> O <sub>2</sub> (%)         | 99.5 ± 0.5 | 99.5 ± 0.4 |
| Glucose concentration (mmol/L)            | 5.5 ± 0.8  | 5.5 ± 0.4  |

## Glossary of Variables

| Variable   | Description                                                                                  | Unit                        |
|------------|----------------------------------------------------------------------------------------------|-----------------------------|
| $A_o(t)$   | Oxygen-only component of <sup>15</sup> O-O <sub>2</sub> arterial input function              | kBq/g                       |
| $A_w(t)$   | Recirculating water component of <sup>15</sup> O-O <sub>2</sub> arterial input function      | kBq/g                       |
| $C_a^o(t)$ | <sup>15</sup> O-O <sub>2</sub> arterial input function                                       | kBq/g                       |
| $C_a^w(t)$ | <sup>15</sup> O-H <sub>2</sub> O arterial input function                                     | kBq/g                       |
| $C_aO_2$   | Arterial content of oxygen                                                                   | mLO <sub>2</sub> /100 mL    |
| $CMRO_2$   | Cerebral metabolic rate of oxygen                                                            | mLO <sub>2</sub> /100 g/min |
| $E$        | Oxygen extraction fraction                                                                   |                             |
| $f$        | Cerebral blood flow                                                                          | mL/100 g/min                |
| $Hb$       | Hemoglobin concentration                                                                     | g/100 mL                    |
| $i$        | Subscript for local measurements                                                             |                             |
| $k_2$      | Efflux rate constant of H <sub>2</sub> <sup>15</sup> O from blood to brain tissue            | min <sup>-1</sup>           |
| $p$        | Blood-brain partition coefficient for water                                                  | mL/100 g                    |
| $P_aO_2$   | Partial pressure of oxygen                                                                   | mmHg                        |
| $S_aO_2$   | Arterial saturation of oxygen                                                                | %                           |
| $S_vO_2$   | Venous saturation of oxygen                                                                  | %                           |
| $V_b^w$    | Cerebral arterial blood volume ( <sup>15</sup> O-H <sub>2</sub> O)                           | mL/100 g                    |
| $V_A^w$    | Cerebral arterial blood volume ( <sup>15</sup> O-O <sub>2</sub> )                            | mL/100 g                    |
| $V_0^o$    | Combination of cerebral arterial and venous blood volumes ( <sup>15</sup> O-O <sub>2</sub> ) | mL/100 g                    |
| $t$        | Time                                                                                         | min                         |
| $T$        | Scan time                                                                                    | min                         |
| $wb$       | Subscript for whole-brain measurements                                                       |                             |
